# Supplementary material
Source: publisher site journal article supplement (https://www.spandidos-publications.com/4446/downloadSupplementary)
Supplement: Supplementary file 1 [file downloadSupplementary]

## Sheet: WGCNA.enrichKEGG
Table SXII. the KEGG pathway
ID	Description	GeneRatio	BgRatio	pvalue	p.adjust	qvalue	geneID	Count
hsa05032	Morphine addiction	14/397	91/8102	0.000123382	0.0360275	0.0332481	109/2560/2570/2770/54331/2785/4988/10846/5153/5138/27115/5151/5566/5567	14
hsa04110	Cell cycle	16/397	124/8102	0.00034153	0.0498633	0.0460166	699/701/8900/890/9133/993/994/996/8317/1028/1111/5347/9978/4087/8243/7529	16
